# Supplementary material for: Fe2O3/Ni Nanocomposite Electrocatalyst on Cellulose for Hydrogen Evolution Reaction and Oxygen Evolution Reaction
Source: MDPI journal article supplement (doi:10.3390/ijms242216282), 2023-11-14
Supplement: s1 [file s1]

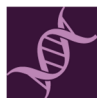

Article

# Construction of Fe<sub>2</sub>O<sub>3</sub>/Ni nanocomposite electrocatalyst on the cellulose as a binder for hydrogen evolution reaction and oxygen evolution reaction

Sadhasivam Thangarasu <sup>\*,†</sup>, Nimisha Baby <sup>†</sup>, Mrunal Bhosale, Jae Man Lee, Chang Seong Jeong and Tae Hwan Oh<sup>\*</sup>

Department of Chemical Engineering, Yeungnam University, Gyeongsan 8541, Republic of Korea; sadhasivam.nano@yu.ac.kr (S.T.); mishababy099@gmail.com (N.B.); mrunal.snst.1@gmail.com (M.B.); ljm9390@yu.ac.kr (J.M.L.); csjeong555@naver.com (C.S.J.); taehwanoh@ynu.ac.kr (T.H.O.)

<sup>\*</sup> Correspondence: sadhasivam.nano@gmail.com and sadhasivam.nano@yu.ac.kr (S.T.); taehwanoh@ynu.ac.kr (T.H.O.)

<sup>†</sup> These authors contributed equally to this work.

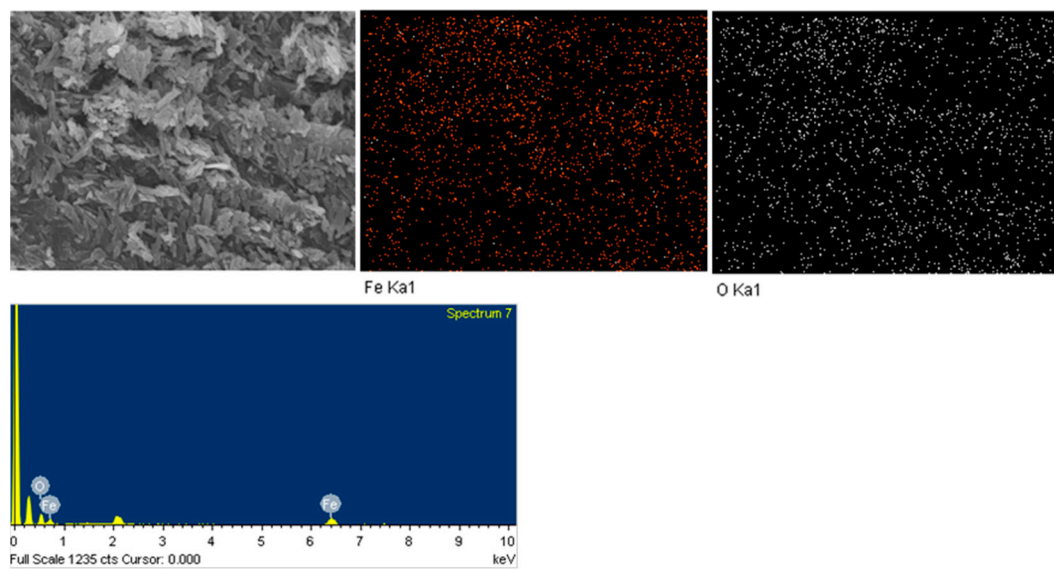

**Figure S1:** EDS mapping and spectra of  $\text{Fe}_2\text{O}_3$ .

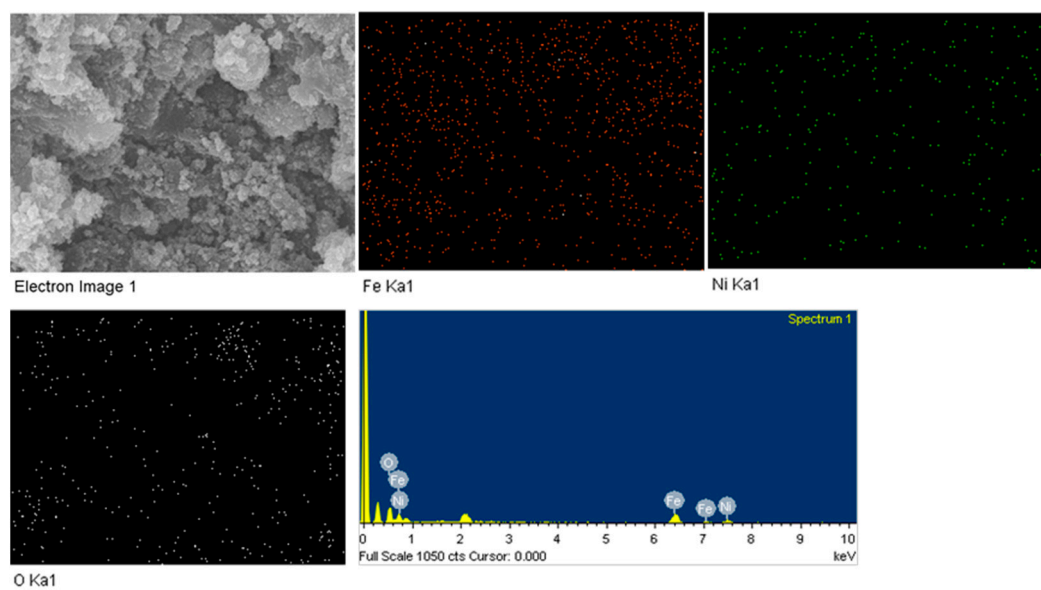

**Figure S2:** EDS mapping and spectra of  $\text{Fe}_2\text{O}_3\text{-Ni}$ .

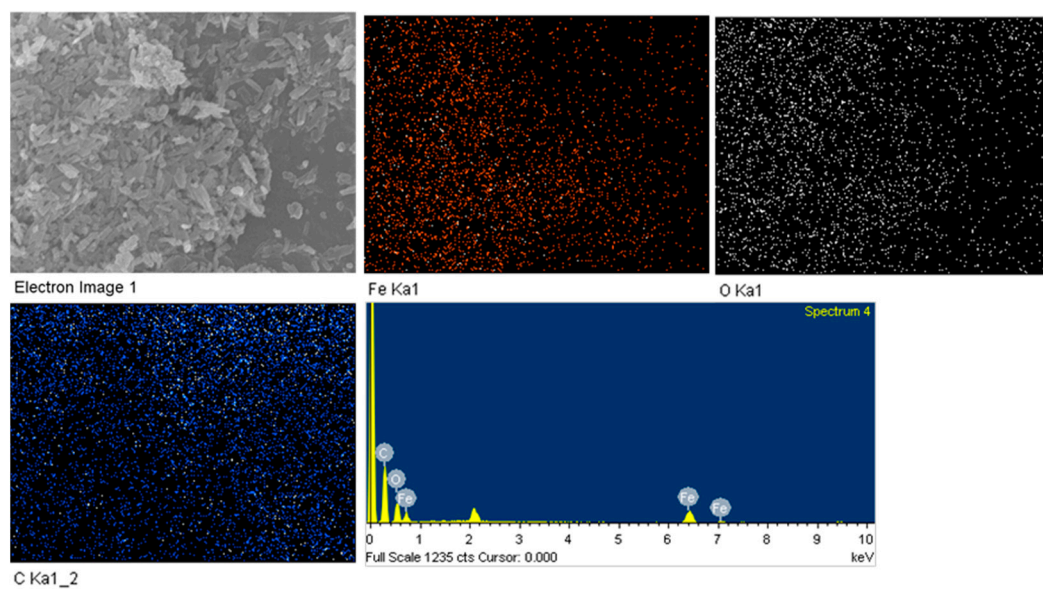

**Figure S3:** EDS mapping and spectra of  $\text{Fe}_2\text{O}_3\text{-MCC}$ .
